# Supplementary material
Source: PubMed Central journal article supplement (PMC3672365)
Supplement: NIHMS452803-supplement-1_si_001.pdf [file NIHMS452803-supplement-1_si_001.pdf]

## SUPPORTING INFORMATION

### Supplemental Methods

#### *S1.1. Marker enzyme assays*

For lactate dehydrogenase activity, 1  $\mu\text{L}$  of each sample was added to 100  $\mu\text{L}$  NADH/Tris/NaCl (0.244 mM NADH, 81.3 mM Tris, 203.2 mM NaCl, pH 7.2) and equilibrated to 30 °C. At  $t_0$ , 20  $\mu\text{L}$  of Tris/NaCl/Na-pyruvate (81.3 mM Tris, 203.2 mM NaCl, pH 7.2, 9.76 mM Na-pyruvate) was added to each sample and the absorbance at 339 nm was measured every 10 min for 1 h at 30 °C using a plate reader (Tecan Safire<sup>2</sup>). The linear portion of the slope of the absorbance at 339 nm vs. time was compared to a purified lactate dehydrogenase enzyme standard.

For hexosaminidase A activity, 10  $\mu\text{L}$  of each sample was added to 70  $\mu\text{L}$  of citrate-phosphate buffer containing substrate (100 mM citrate-phosphate buffer, pH 4.7, 7.5 mM *p*-nitrophenol-*N*-acetyl- $\beta$ -d-glucosaminide) and incubated for 1 h at 37 °C. To stop the reaction, 200  $\mu\text{L}$  of borate buffer (200 mM borate buffer, pH 9.8) was added to each sample. For alkaline phosphatase activity, 20  $\mu\text{L}$  of each sample was added to 140  $\mu\text{L}$  borate buffer containing substrate (50 mM sodium borate, 1 M  $\text{MgCl}_2$ , pH 9.8, 16 mM *p*-nitrophenyl phosphate) and incubated for 1-4 h at 37 °C. The specific enzyme activity was calculated by measuring the absorbance at 405 nm using a plate reader and comparing the released *p*-nitrophenol to a standard of *p*-nitrophenol.

For succinate dehydrogenase activity, 20  $\mu\text{L}$  of each sample was added to 140  $\mu\text{L}$  of Tris-EDTA-succinate buffer containing substrate (20 mM Tris-HCl, pH 7.4, 100  $\mu\text{M}$  EDTA, 200 mM sodium succinate, 203 mM NaCl, 2.5 mg/mL 2-*p*-iodonitrotetrazolium violet (INT)) and incubated for 1-4 h at 37 °C. The specific enzyme activity was calculating by measuring the absorbance at 492 nm using a plate reader and comparing the reduced INT to a standard of formazan-INT.

#### *S1.2. Gel retardation assay*

Polyplex condensation was determined using a gel retardation assay. An equivolume of polymer was added to 0.5  $\mu\text{g}$  plasmid DNA at different charge ratios (N/P) and allowed to complex for 10 min at room temperature. Prior to loading into a 0.8% agarose gel containing TAE buffer (40 mM Tris-acetate, 1 mM EDTA), 10X BlueJuice loading buffer (Life Technologies, Carlsbad, CA) was added to the samples. The gel was then electrophoresed at 100 V for 30-45 min. Plasmid DNA was visualized using ethidium bromide staining via an UV transilluminator (laser-excited fluorescence gel scanner, Kodak, Rochester, NY).

## Supplemental Figures

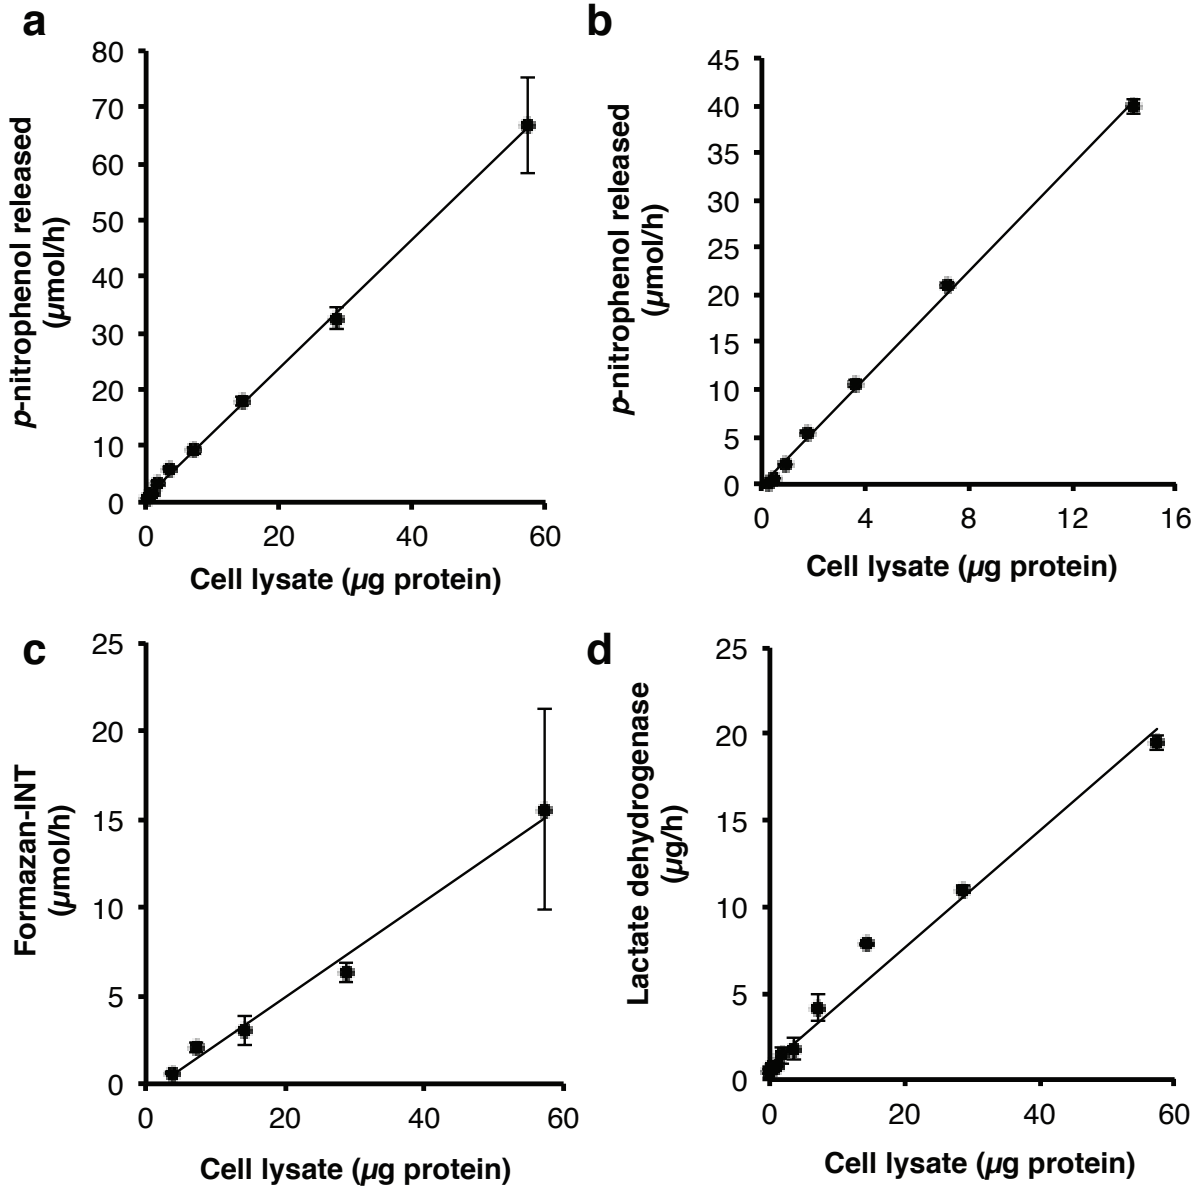

**Supplemental Figure 1.** Evaluation of marker enzyme assays. (a) HeLa cells ( $2 \times 10^7$ ) were lysed through six freeze-thaw cycles and the resulting cell lysate was used to evaluate marker enzyme assays for (b) alkaline phosphatase (plasma membrane), (c) hexosaminidase A (lysosomes), (d) succinate dehydrogenase (mitochondria), and (e) lactate dehydrogenase (cytosol). Data are presented as mean  $\pm$  S.D.,  $n = 3$ .

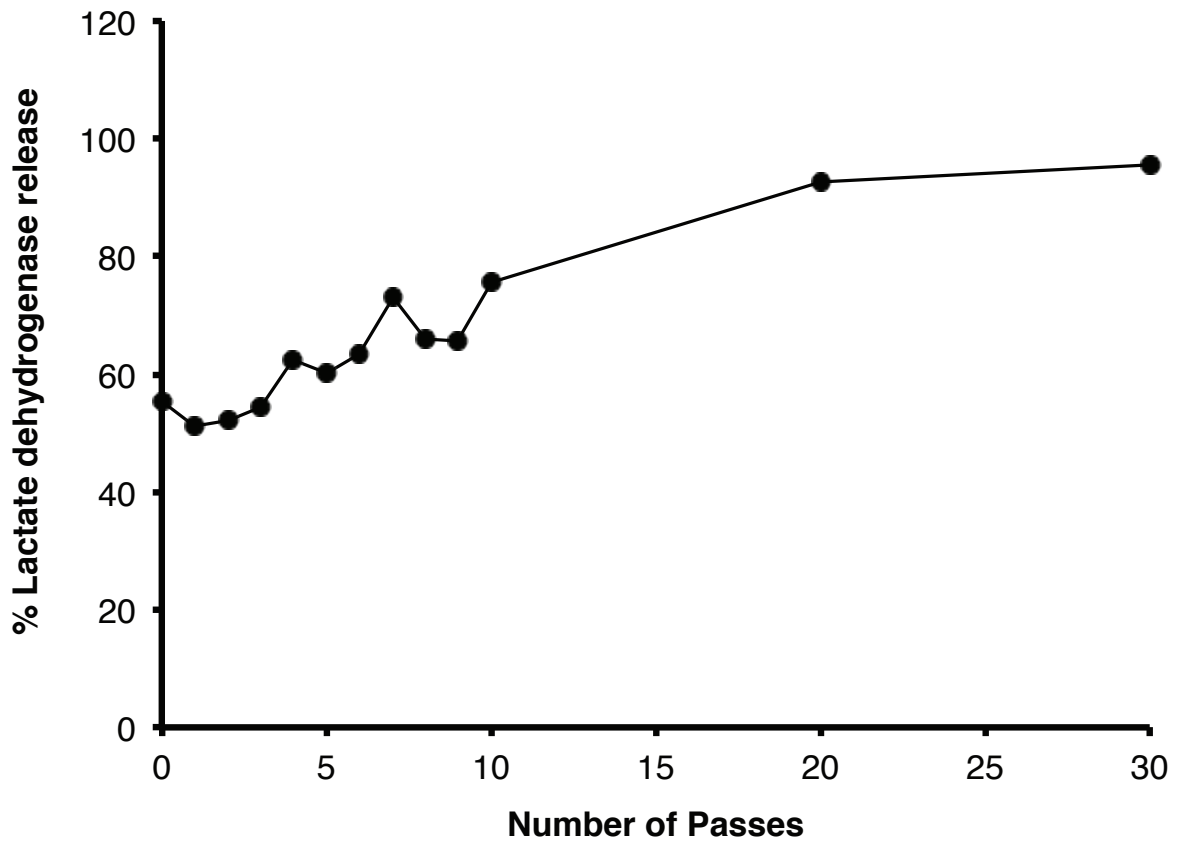

**Supplemental Figure 2.** Optimization of cell lysis with a needle and syringe. HeLa cells ( $2 \times 10^7$ ) were lysed through a 25-gauge needle and the supernatant was measured for lactate dehydrogenase release after a various number of passages.

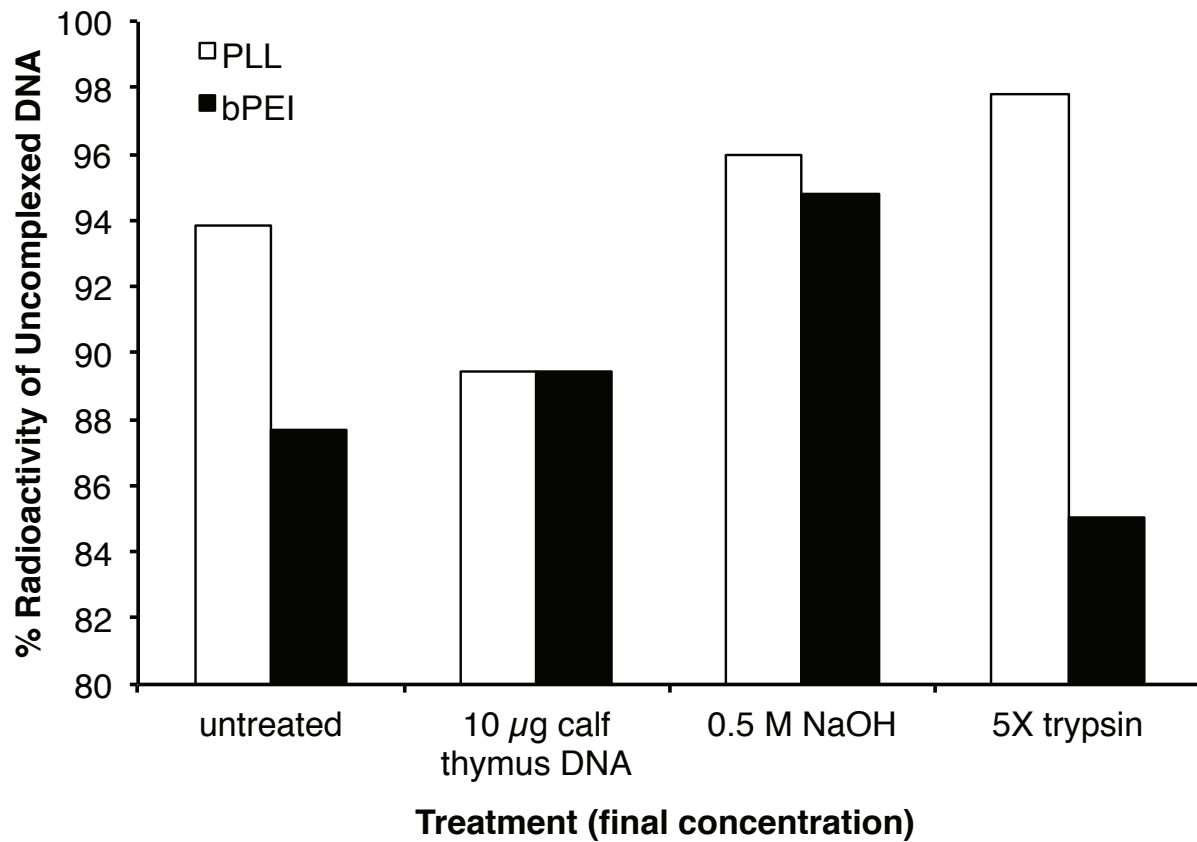

**Supplemental Figure 3.** Optimization of polyplex unpackaging for radioactivity measurements. Polyplexes were formed with 1  $\mu\text{g}$  [ $^3\text{H}$ ]DNA/unlabeled DNA mixture and unlabeled polymer, and subsequently treated with either 10  $\mu\text{g}$  calf thymus DNA (to compete off radiolabeled DNA), 0.5 M NaOH (to deprotonate amines on the polymer), and 5X trypsin (to degrade polymer). Radioactivity counts are expressed as a percentage of the radioactivity count from uncomplexed DNA.

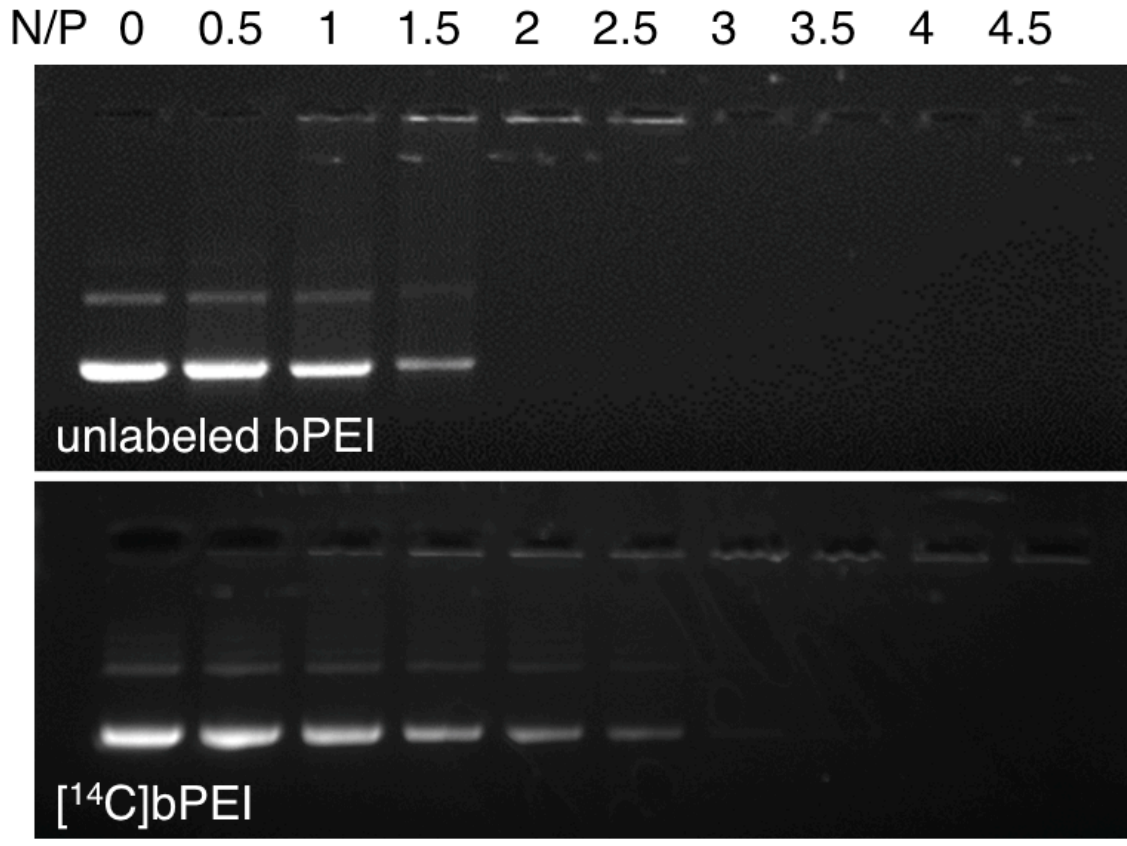

**Supplemental Figure 4.** Gel retardation assay of unlabeled and [<sup>14</sup>C]-labeled bPEI. [<sup>14</sup>C]-labeled and unlabeled bPEI were complexed with unlabeled plasmid DNA at different charge ratios (N/P) and loaded onto 0.8% agarose gels. Plasmid DNA was visualized using ethidium bromide.

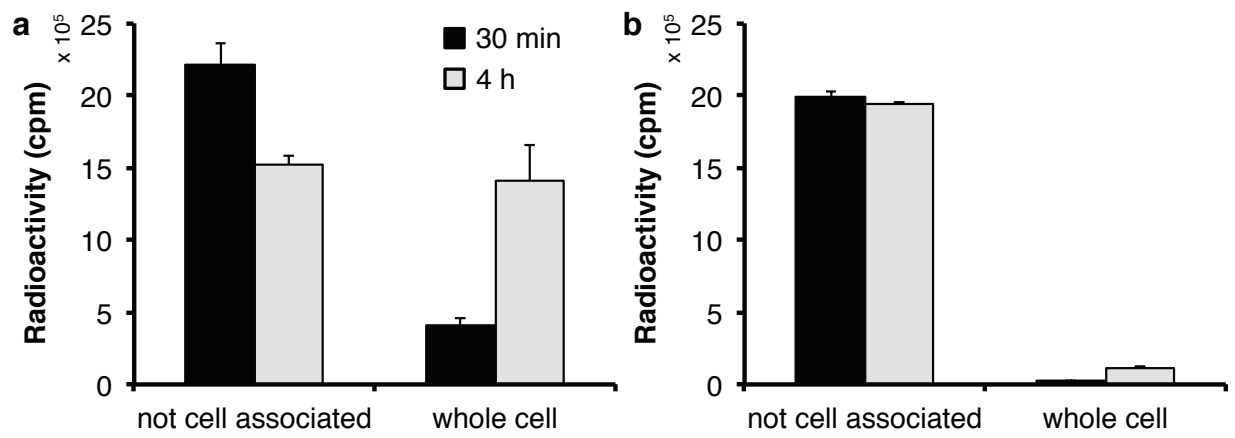

**Supplemental Figure 5.** Extracellular and cellular distribution of [<sup>3</sup>H]DNA/[<sup>14</sup>C]bPEI polyplexes in treated cells fractionated using differential centrifugation. HeLa cells (10<sup>7</sup>) were incubated with [<sup>3</sup>H]DNA/[<sup>14</sup>C]bPEI polyplexes for 1 h at 4 °C to allow for binding and then at 37 °C for 30 min (black bars) or 4 h (grey bars) to allow for internalization prior to fractionation. The radioactivity of (a) [<sup>3</sup>H]DNA and (b) [<sup>14</sup>C]bPEI measured in media and washes, which are "not cell associated", and whole cell fractions. Data are presented as mean ± S.D., *n* = 3.

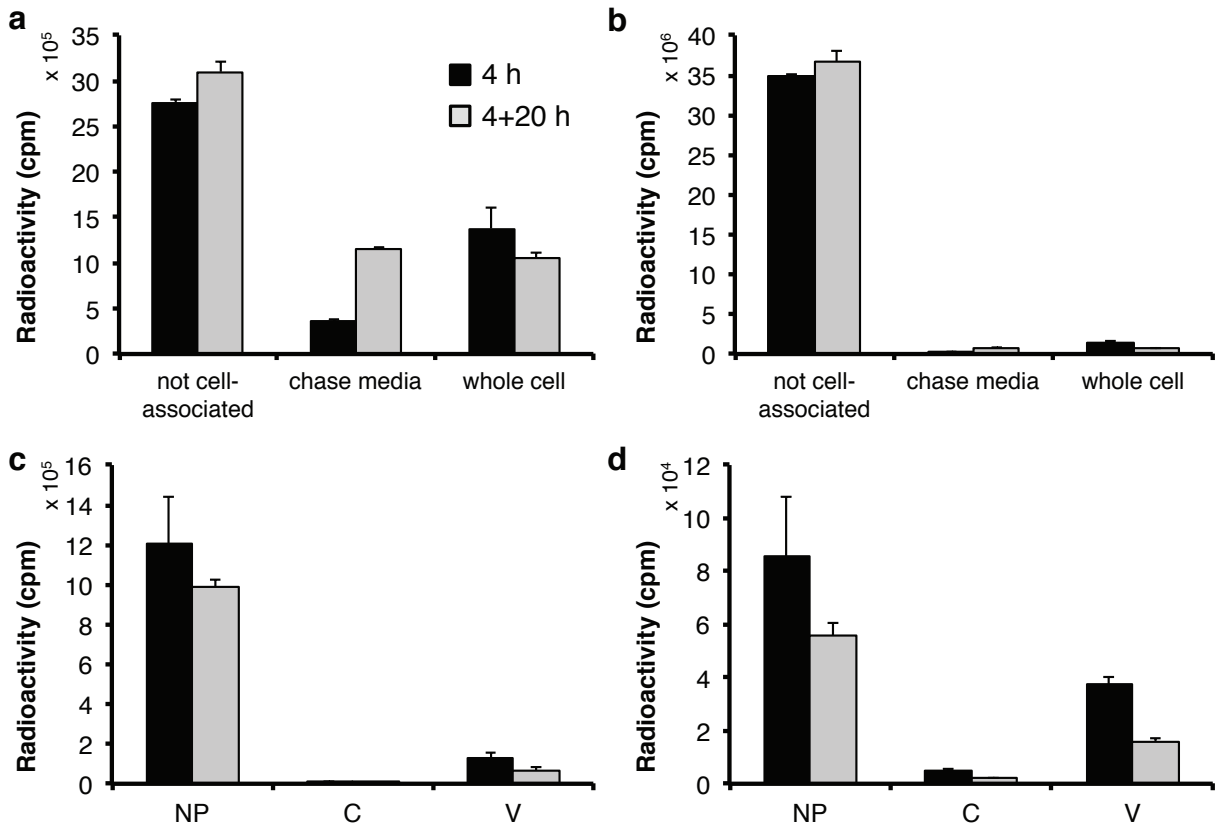

**Supplemental Figure 6.** Distribution of [<sup>3</sup>H]DNA/[<sup>14</sup>C]bPEI polyplexes in treated cells fractionated using density-gradient centrifugation. HeLa cells ( $2 \times 10^7$ ) were pulsed with [<sup>3</sup>H]DNA/[<sup>14</sup>C]bPEI polyplexes for 4 h, and then prepared for fractionation. A 5-20% continuous iodixanol gradient was used to separate vesicular organelles. The radioactivity of (a) [<sup>3</sup>H]DNA and (b) [<sup>14</sup>C]bPEI measured in pulse media and washes, which are "not cell associated", chase media, and whole cell fractions. The radioactivity of (c) [<sup>3</sup>H]DNA and (d) [<sup>14</sup>C]bPEI measured in the nuclear, cytosolic, and vesicular fractions. Data are presented as mean  $\pm$  average deviation (range divided by 2),  $n = 2$ .

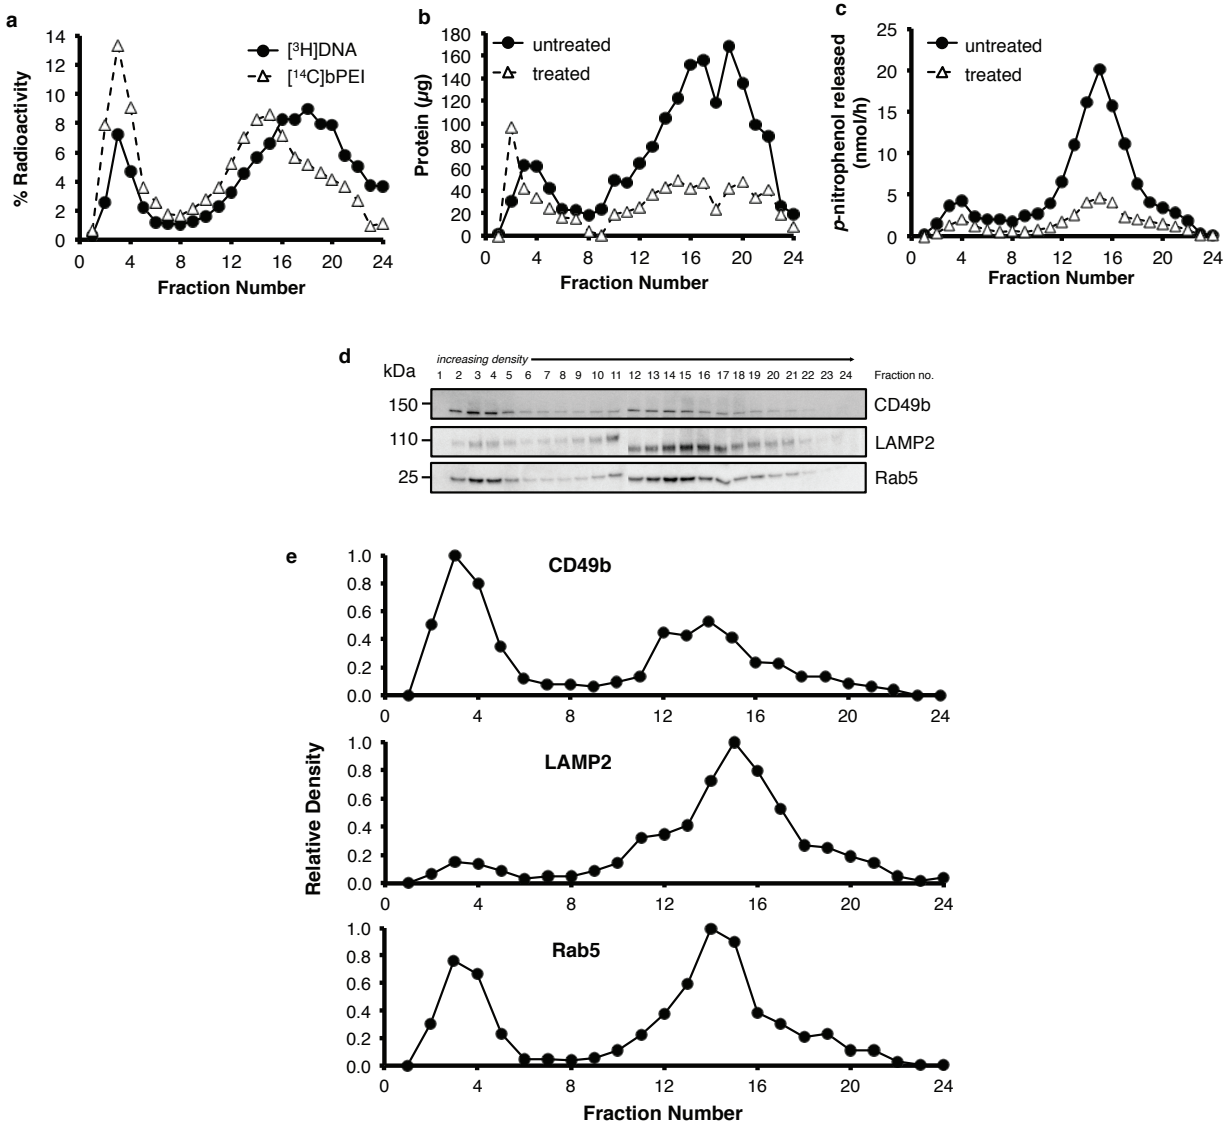

**Supplemental Figure 7.** Distribution of  $[^3\text{H}]\text{DNA}/[^{14}\text{C}]\text{bPEI}$  polyplexes after 4 h pulse-20 h chase in cells fractionated using a 5-20% continuous iodixanol density gradient. HeLa cells ( $2 \times 10^7$ ) were pulsed with  $[^3\text{H}]\text{DNA}/[^{14}\text{C}]\text{bPEI}$  polyplexes for 4 h, chased in complete media for 20 h, and then prepared for fractionation. A 5-20% continuous iodixanol gradient was used to separate vesicular organelles. (a) The percent radioactivity measured in fractions from the 5-20% gradient. 100% radioactivity is equal to the sum of the radioactivity found in all 24 fractions collected from the 5-20% gradient. (b) Total protein was measured in untreated and treated gradient fractions. (c) Hexosaminidase A (lysosome) activity was also measured in untreated and treated gradient fractions. (d) An equivolume ( $250 \mu\text{L}$ ) of gradient fractions from treated samples was precipitated, concentrated, and probed for *CD49b* (plasma membrane), *LAMP2* (lysosome), and *Rab5* (endosome). (e) The optical density of each band was measured using ImageJ. Each time point presented is representative of duplicate experiments.
